# Supplementary material for: The mechanism of [2 + 1] and [2 + 2] cycloaddition reactions of 1-phenylseleno-2-(trimethylsilyl)ethene: an isotopic labelling study †
Source: Royal Society of Chemistry journal article supplement (doi:10.1039/a909919k), 2000-01-01
Supplement: a909919k.pdf [file a909919k.pdf]

## Supplementary Data

### The Mechanism of [2+1] and [2+2] Cycloaddition Reactions of 1-(Phenylseleno)-2-(trimethylsilyl)ethene: An Isotopic Labelling Study

Shoko Yamazaki\* and Yuichiro Yanase

*Department of Chemistry, Nara University of Education, Takabatake-cho, Nara 630-8528, Japan*

Kagetoshi Yamamoto

*Department of Chemistry, Graduate School of Science, Osaka University, Toyonaka, Osaka 560-0043, Japan*

#### Contents

|                                               |          |
|-----------------------------------------------|----------|
| 1. Copy of NOESY spectra for <b>3-1-d</b> .   | page 1-3 |
| 2. Copies of HMBC spectra for <b>7-1-d</b> .  | page 4   |
| 3. Copies of HMBC spectra for <b>8-1-d</b> .  | page 5   |
| 4. Copies of NOESY spectra for <b>9-2-d</b> . | page 6-7 |

PCYCL000

exp5 neway

ACQUISITION ARRAYS  
array phase  
arraydim 512  
phase 1  
1 1  
2 2

DATE

200

200

200

200

200

200

200

200

200

200

200

200

200

200

200

200

200

200

200

200

200

200

200

200

200

200

200

200

200

200

200

200

200

200

200

200

200

200

200

200

200

200

200

200

200

200

200

200

200

200

200

200

200

200

200

200

200

200

200

200

200

200

200

200

200

200

200

200

200

200

ACQUISITION ARRAYS  
array phase  
arraydim 512  
phase 1  
1 1  
2 2

DATE

200

200

200

200

200

200

200

200

200

200

200

200

200

200

200

200

200

200

200

200

200

200

200

200

200

200

200

200

200

200

200

200

200

200

200

200

200

200

200

200

200

200

200

200

200

200

200

200

200

200

200

200

200

200

200

200

200

200

200

200

200

200

200

200

200

200

200

200

200

200

ACQUISITION ARRAYS  
array phase  
arraydim 512  
phase 1  
1 1  
2 2

DATE

200

200

200

200

200

200

200

200

200

200

200

200

200

200

200

200

200

200

200

200

200

200

200

200

200

200

200

200

200

200

200

200

200

200

200

200

200

200

200

200

200

200

200

200

200

200

200

200

200

200

200

200

200

200

200

200

200

200

200

200

200

200

200

200

200

200

200

200

200

200

ACQUISITION ARRAYS  
array phase  
arraydim 512  
phase 1  
1 1  
2 2

DATE

200

200

200

200

200

200

200

200

200

200

200

200

200

200

200

200

200

200

200

200

200

200

200

200

200

200

200

200

200

200

200

200

200

200

200

200

200

200

200

200

200

200

200

200

200

200

200

200

200

200

200

200

200

200

200

200

200

200

200

200

200

200

200

200

200

200

200

200

200

200

ACQUISITION ARRAYS  
array phase  
arraydim 512  
phase 1  
1 1  
2 2

DATE

200

200

200

200

200

200

200

200

200

200

$\tau_k = 4$

2

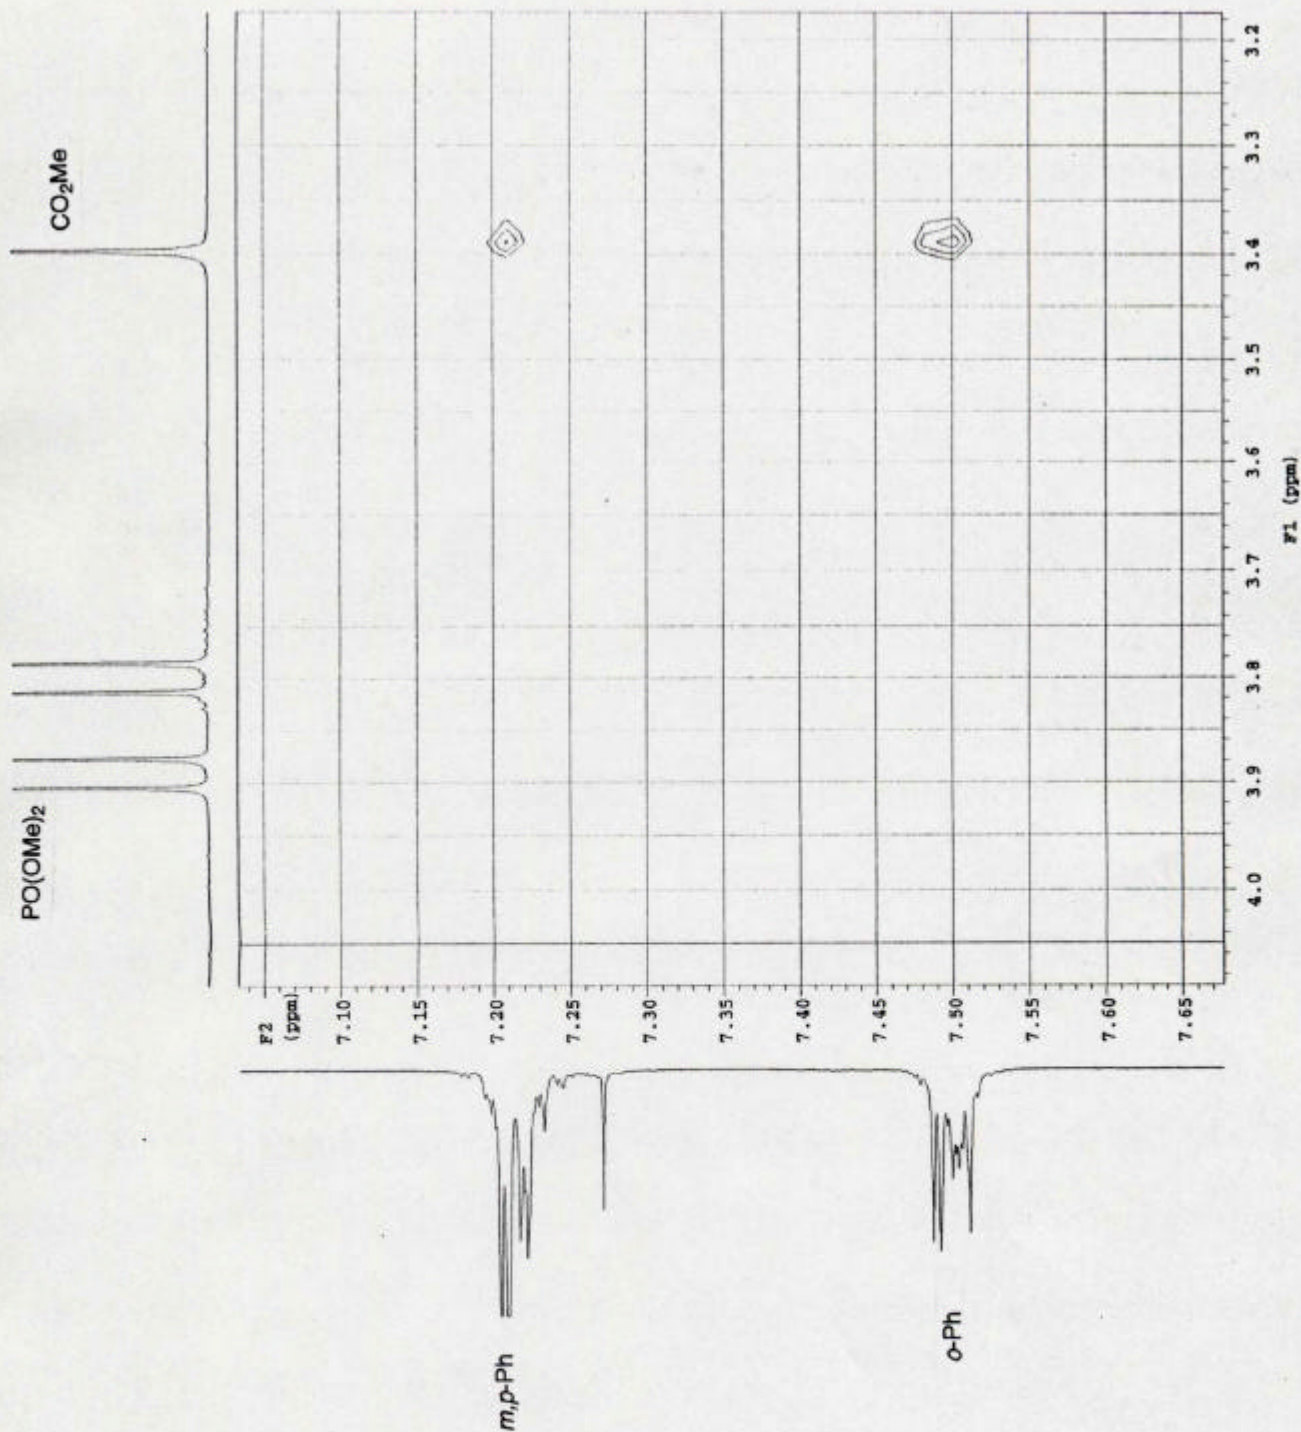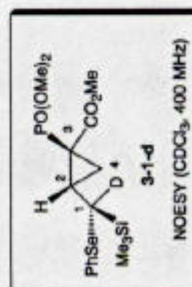



$\tau_k=5$

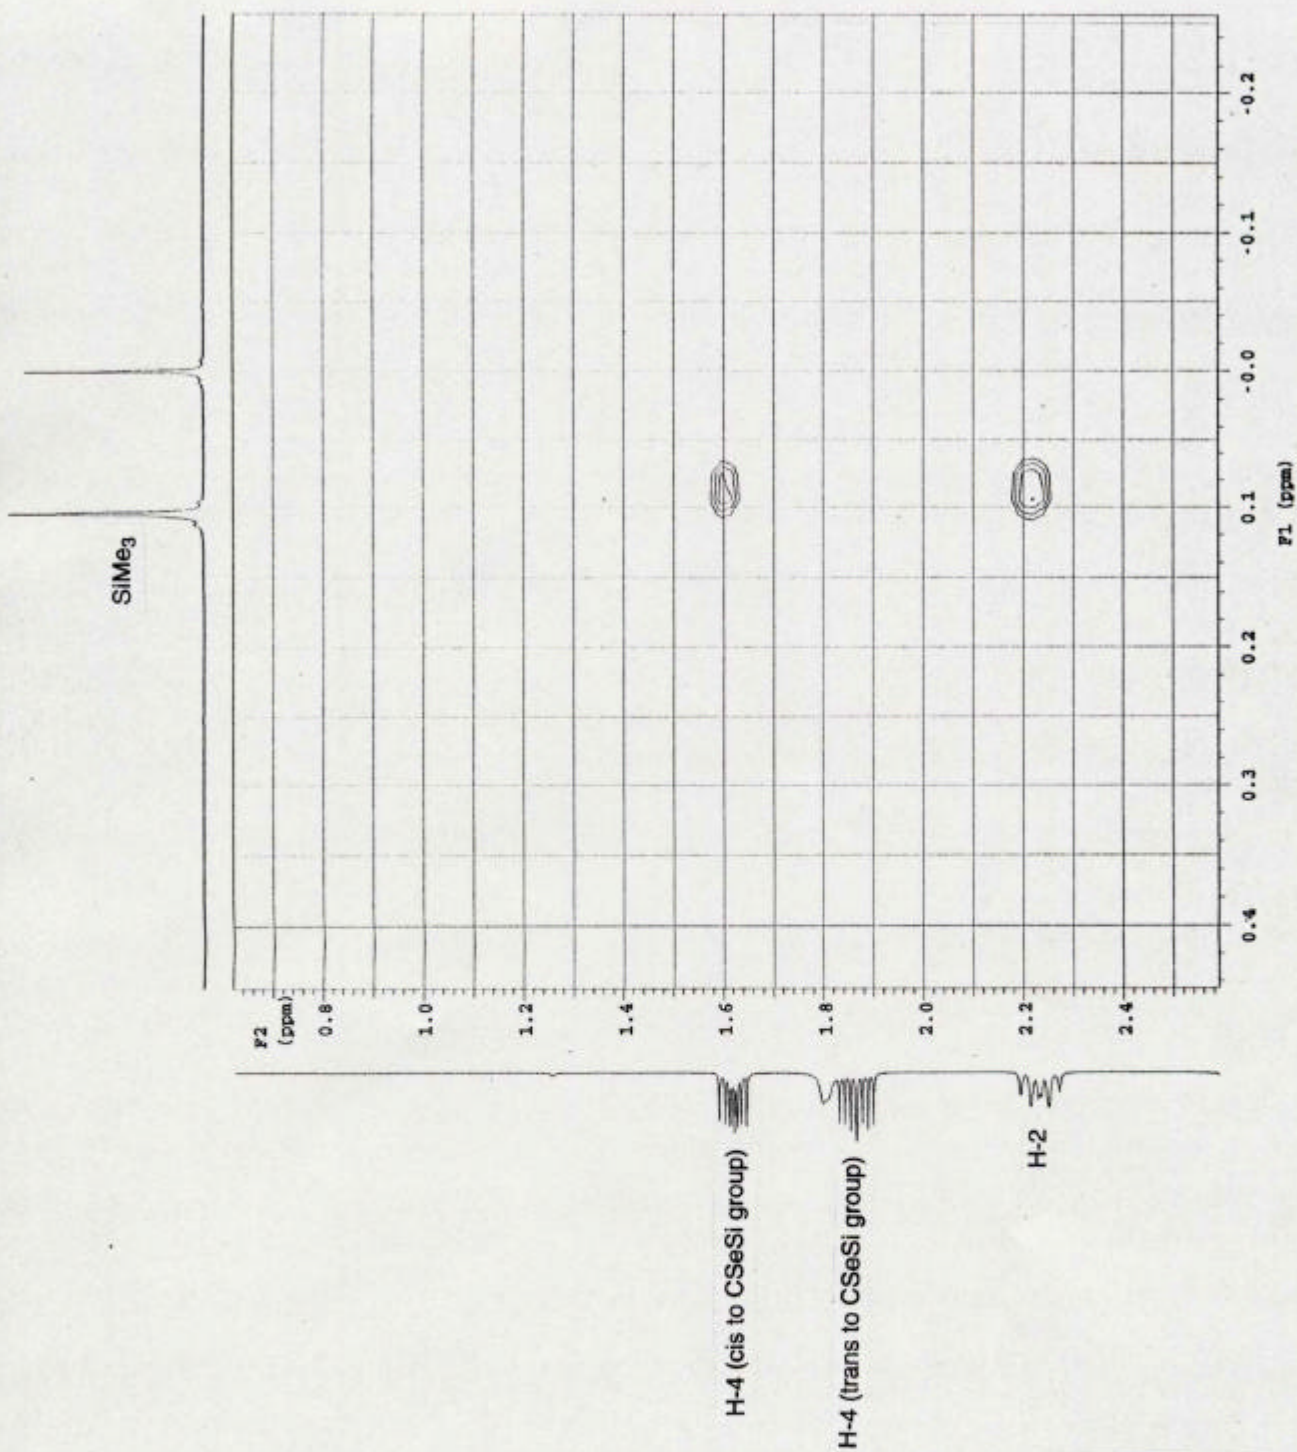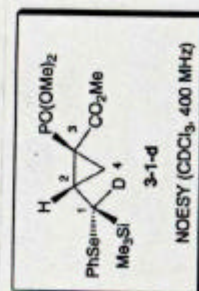

1989

[illegible]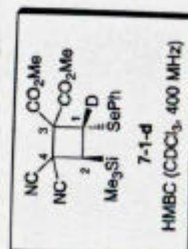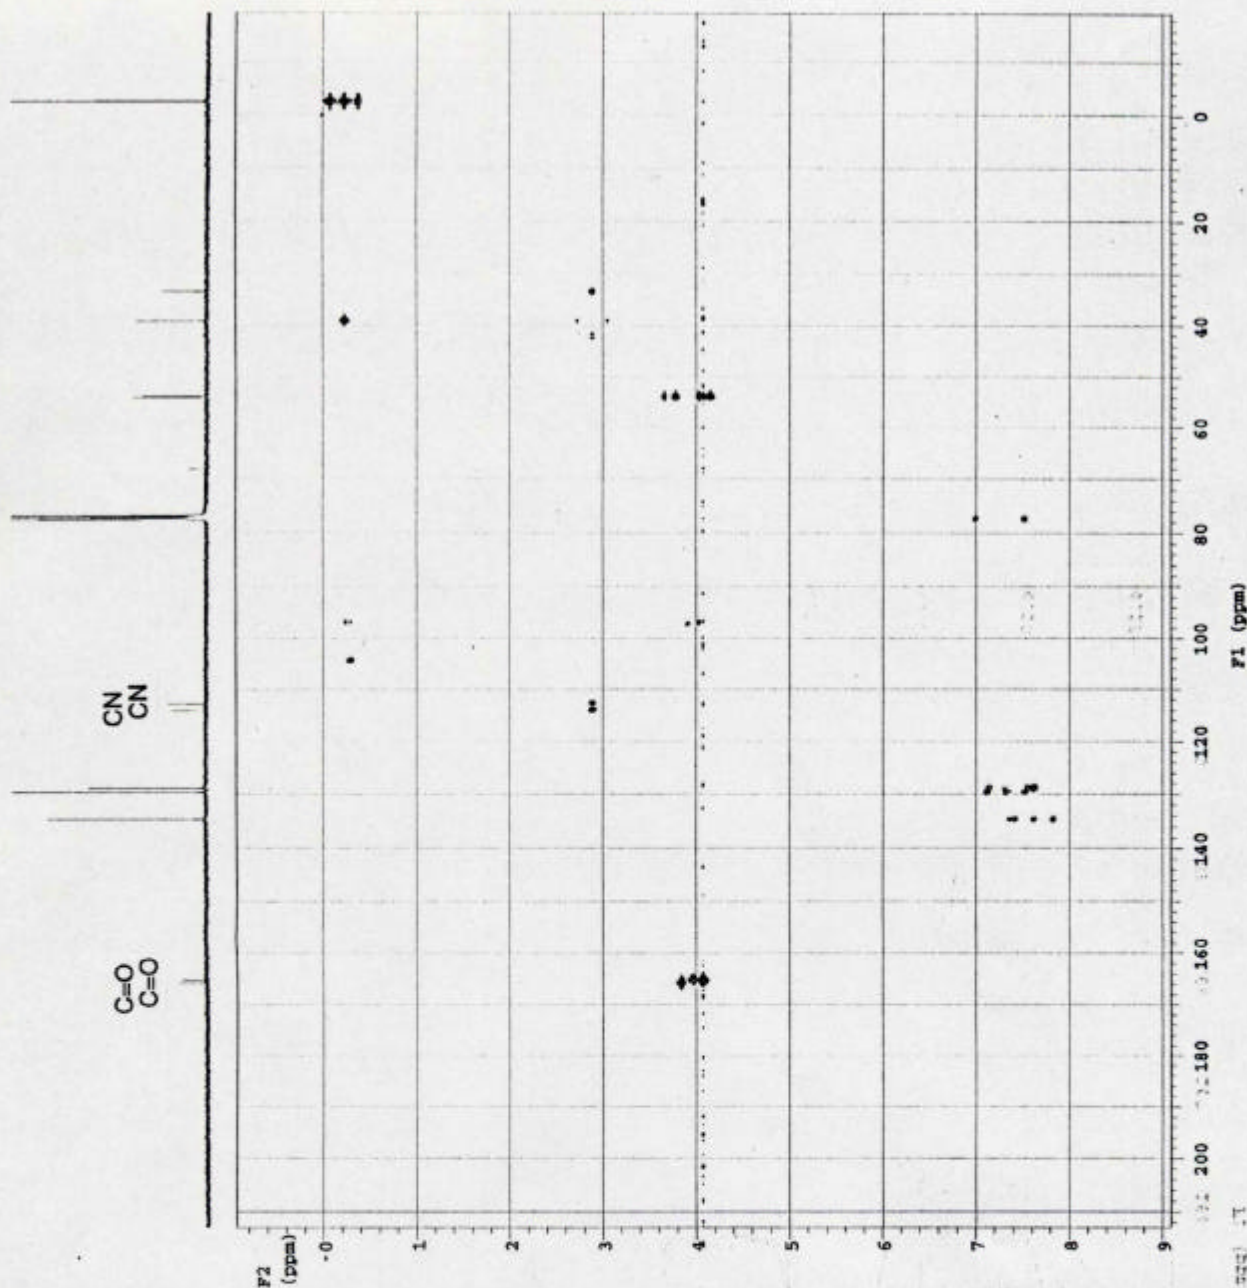





Cyclodextrin

exp7 nusey

SAMPLE DATE Jan 29 99 DEFC 359.944  
 solvent CDCl3 dn HI 10  
 file /export/home/~dper  
 vnmr1/no/ymsae2/C- Acf  
 yoldetac\_mony dn n 1  
 yoldetac\_mony c 2  
 ACQUISITION  
 afeq 359.944 adf 200  
 to HI dmec 1.0  
 at 0.124 dmec 1.0  
 up 1024 homo PROCESSING  
 wv 4059.9  
 fb 2000 gt 9.059  
 ba 4 gfs not used  
 ee 8 wfile  
 tpr 61 proc ft  
 pw 11.0 fn 1024  
 dl 1.256 math z  
 presat 0  
 mix 1.200 warr  
 tof -359.7 wexp  
 at 40 wst  
 ct 40 wst  
 n 2D PROCESSING  
 alock n 50 gfi 0.029  
 gain FLAG 50 gfi not used  
 ii y wfile  
 la n proc ft  
 qp y fn 1024  
 la y  
 n  
 2D ACQUISITION  
 wv 4059.9  
 nl 256  
 phase nusey  
 DISPLAY  
 sp -164.4  
 wp 3376.6  
 vs 500  
 ac 19  
 wc 200  
 hnm 16.48  
 ls 500.00  
 rll 1516.4  
 rfp 1142.8  
 th 4  
 lsa 100.000  
 al p0  
 2D DISPLAY  
 ap1 -164.4  
 wp1 3376.6  
 ad1 9  
 wd1 200  
 rll1 1516.4  
 rfp1 0

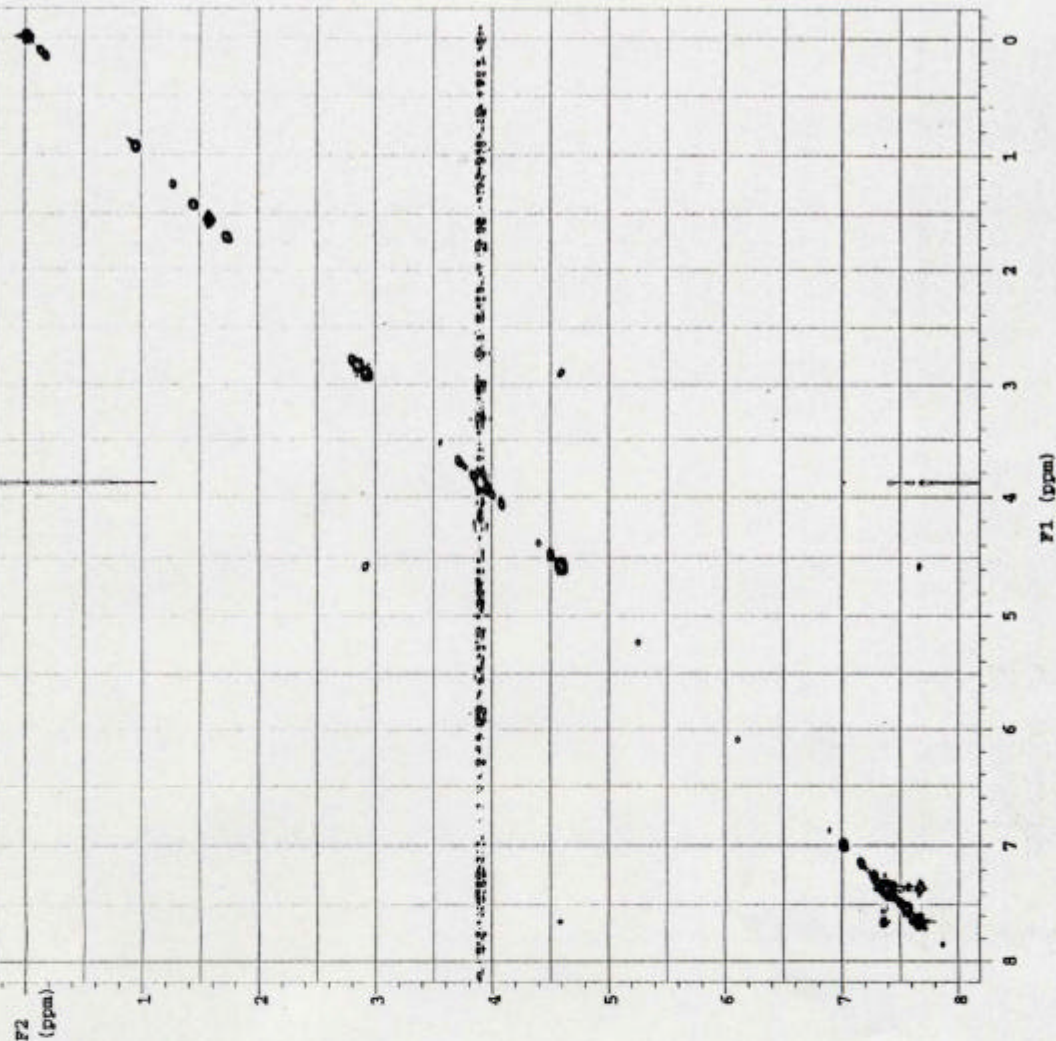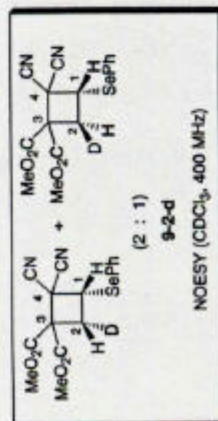



H-1

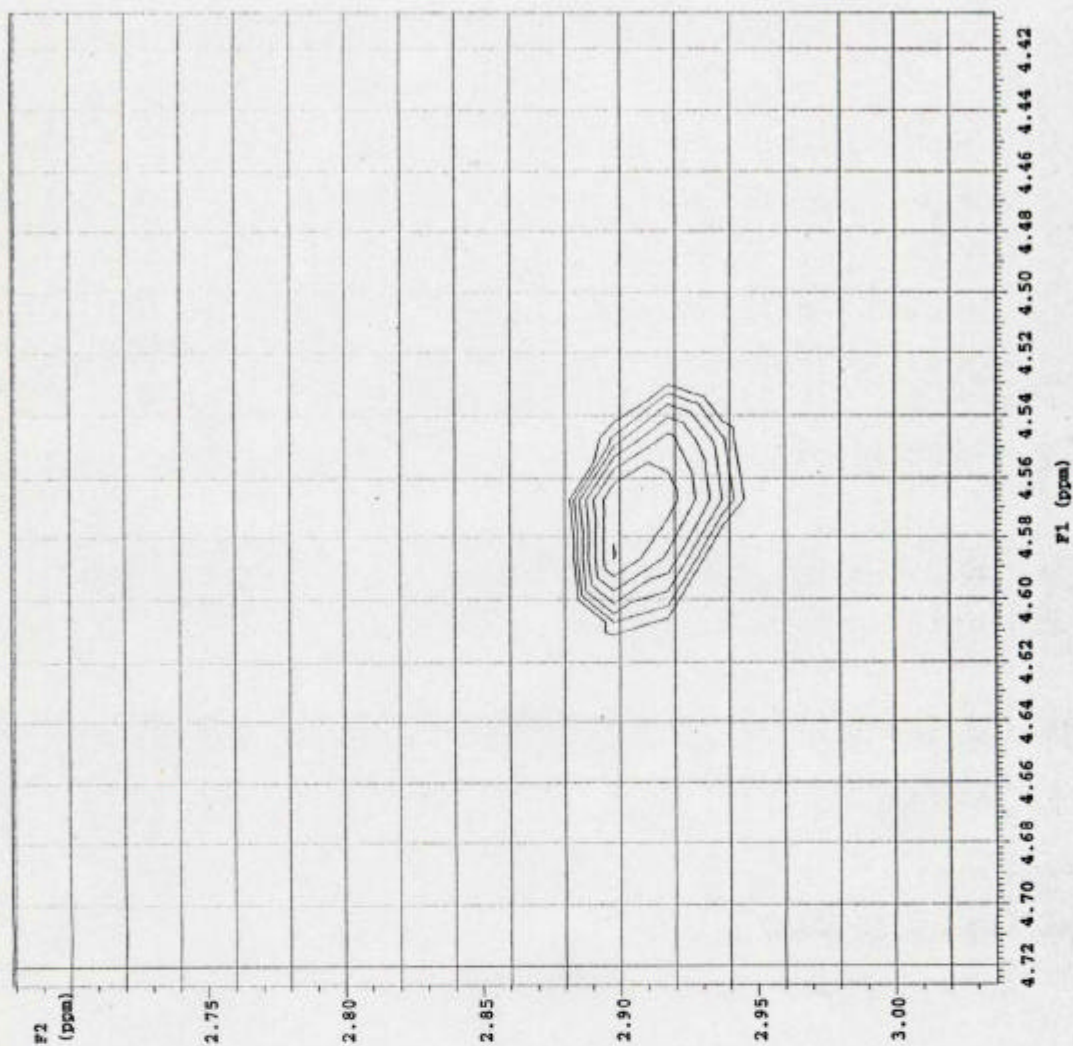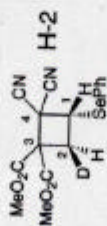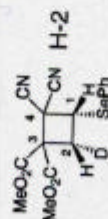

9-2-d  
NOESY (CDCl<sub>3</sub>, 400 MHz)
